# Supplementary material for: Pms2 and uracil-DNA glycosylases act jointly in the mismatch repair pathway to generate Ig gene mutations at A-T base pairs
Source: PubMed Central journal article supplement — J Exp Med. 2017 Apr 3;214(4):1169–80. doi: 10.1084/jem.20161576 (PMC5379981; doi:10.1084/jem.20161576), 2017-04-03
Supplement: JEM_20161576_sm.pdf [file JEM_20161576_sm.pdf]

## SUPPLEMENTAL MATERIAL

Girelli Zubani et al., <https://doi.org/10.1084/jem.20161576>

Table S1. Primers for cell cycle–restricted AID constructs

| Primer name                                       | Primer sequence (5'–3')                                                  |
|---------------------------------------------------|--------------------------------------------------------------------------|
| mAID-For-EcoRI                                    | <i>AGAATT</i> CGCTAGCACCATGGACAGCCT                                      |
| mAID-(G <sub>4</sub> S) <sub>2</sub> -Rev-HindIII | TAAAGCTTAGAGCCTCCGCCTCCTGAGCCTCCTCCGCCAGATCCGCCCTCCAATCCCAACATACGAAATGCA |
| hCDT1-Rev-EcoRI                                   | <i>AGAATT</i> CTTAGATGGTGTCTGGTCTGGC                                     |
| hCDT1mut-For                                      | GCCCGCGGGCAGCGGGTGTGGTGGACGAG                                            |
| hCDT1mut-Rev                                      | CAGCCGCGCTGCCGCGGGCGGTGGCCTGGC                                           |
| mAID-BgIII-For                                    | AAAGATCTGCCACCATGGACAGCCTTCTGATGAA                                       |
| mAID-Cherry-For                                   | CGGAGGCTCTGTGAGCAAGGGCGAGGA                                              |
| mAID-Cherry-Rev                                   | CCTTGCTCACAGGCCTCCGCCTCCTGAG                                             |
| hGem-Rev-EcoRI                                    | AAAGATCTTAATTAAGCGCCTTCTCCGTTTTTC                                        |
| hGem-mut-For                                      | TTCTGTCCCATCTGCATCTGGATCTTTGTTG                                          |
| hGem-mut-Rev                                      | CAGATGCAGATGGGACAGAAGTATTCTTTATA                                         |

Restriction sites are in italics.

Table S2. Primers for shRNA constructs

| Primer name            | Primer sequence (5'–3')                                         |
|------------------------|-----------------------------------------------------------------|
| EmGFP-EcoRI-For        | <i>AGGAATT</i> CACCATGGTGAGCAAGGGCGA                            |
| EmGFP-XhoI-Rev         | ATCTCGAGTCCGCCAGATCT                                            |
| shRNA-miR Tdg-1-top    | TGCTGTAGTAATGAACCTTGTCTGGGTTTTGGCCACTGACTGACCCAGGACAGTTCATTA    |
| shRNA-miR Tdg-1-bottom | CCTGTTAGTAATGAACCTGCTGGGTCAGTCAGTGGCCAAAACCCAGGACAAAGTTCATTA    |
| shRNA-miR Tdg-2-top    | TGCTGTTACTAGACAGATCCTGCTGGTTTTGGCACTGACTGACCAGCAAGGCTGTCTAGTAA  |
| shRNA-miR Tdg-2-bottom | CCTGTTACTAGACAGCCTTGTGGTCAGTCAGTGGCCAAAACCCAGGACAAAGTTCATTA     |
| shRNA-miR Smug1-top    | TGCTGAAGAGTAGAGGACACAGATTGGTTTTGGCCACTGACTGACCAATCTGTCTCTACTCTT |
| shRNA-miR Smug1-bottom | CCTGAAGAGTAGAGGACACAGATTGGTCAGTCAGTGGCCAAAACCAATCTGTCTCTACTCTT  |
| shRNA-miR Mbd4-top     | TGCTGAACACCAGTATGCAAATGTGGTTTTGGCCACTGACTGACGCACATTTATACTGGTGT  |
| shRNA-miR Mbd4-bottom  | CCTGAACACCAGTATAAATGTGGTCAGTCAGTGGCCAAAACGCACATTTGCATACTGGTGT   |

Restriction sites are in italics, and shRNA sequences are underlined.
